# Supplementary material for: Differentially Expressed Genes Related to Flowering Transition between Once- and Continuous-Flowering Roses
Source: MDPI journal article supplement (doi:10.3390/biom12010058), 2021-12-31
Supplement: s1 [file s1]

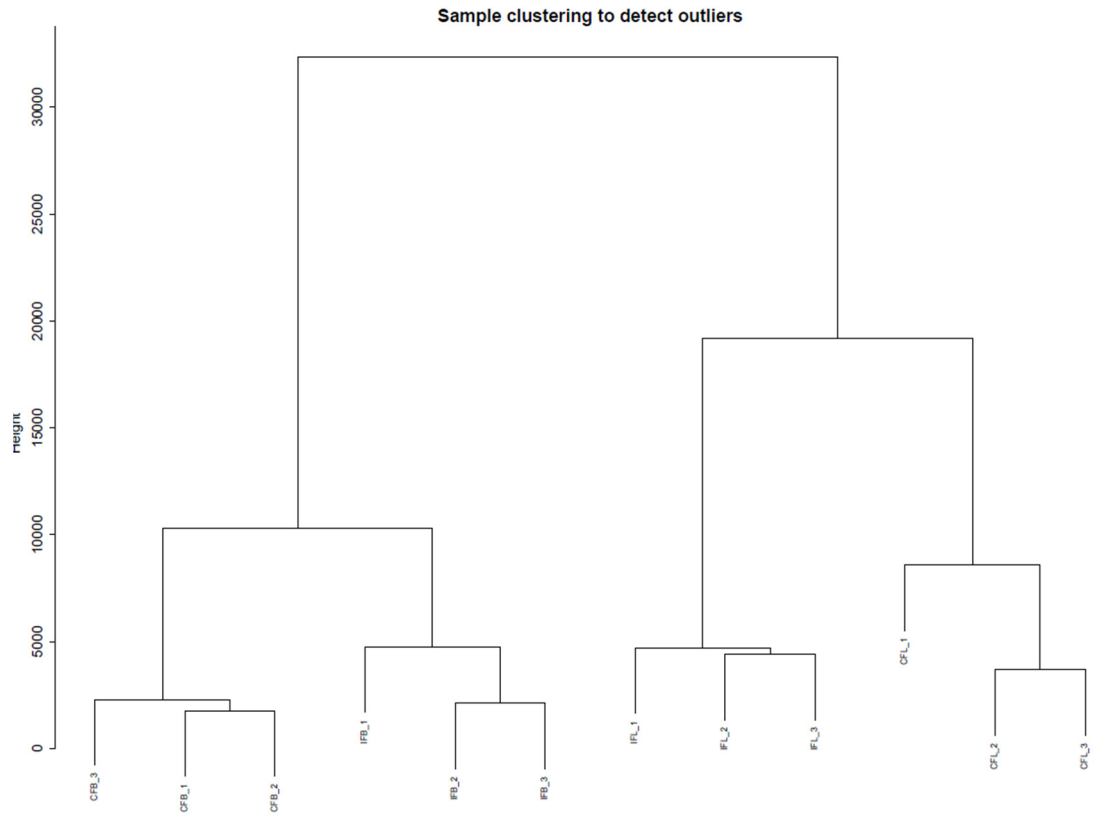

**Figure S1:** Sample cluster analysis. IFB\_1, IFB\_2, IFB\_3: buds in once flowering rose; CFB\_1, CFB\_2, CFB\_3: buds in continuous flowering rose; IFL\_1, IFL\_2, IFL\_3: leaves in once flowering rose; CFL\_1, CFL\_2, CFL\_3: leaves in continuous flowering rose.

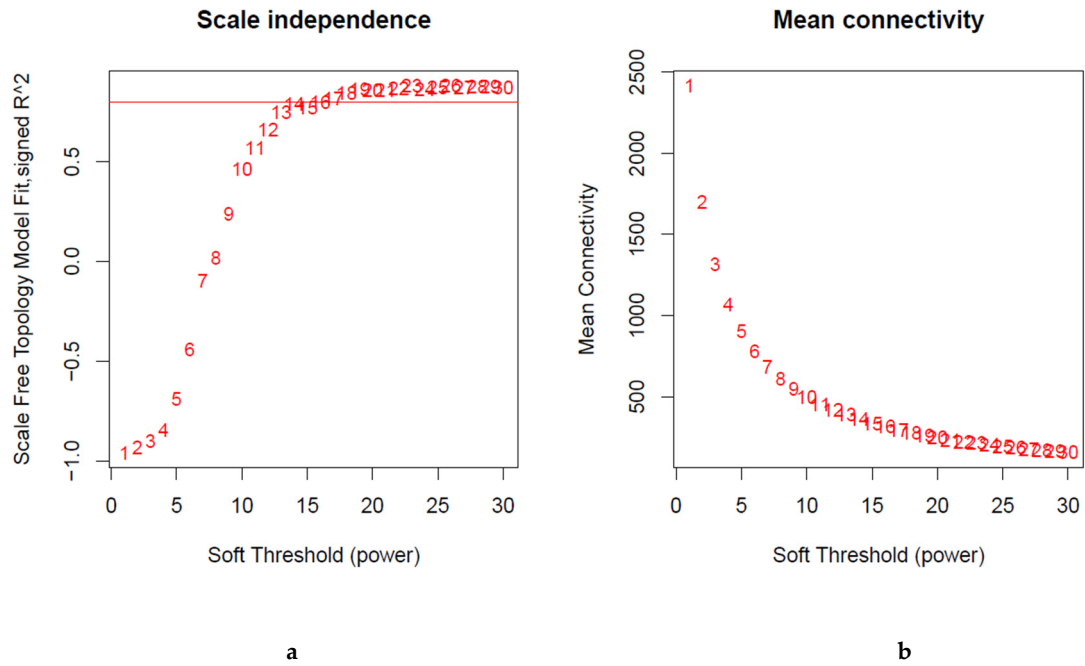

**Figure S2.** Analysis of network topology for various soft-thresholding powers. (a) the curve of Power; (b) the curve of mean connectivity.

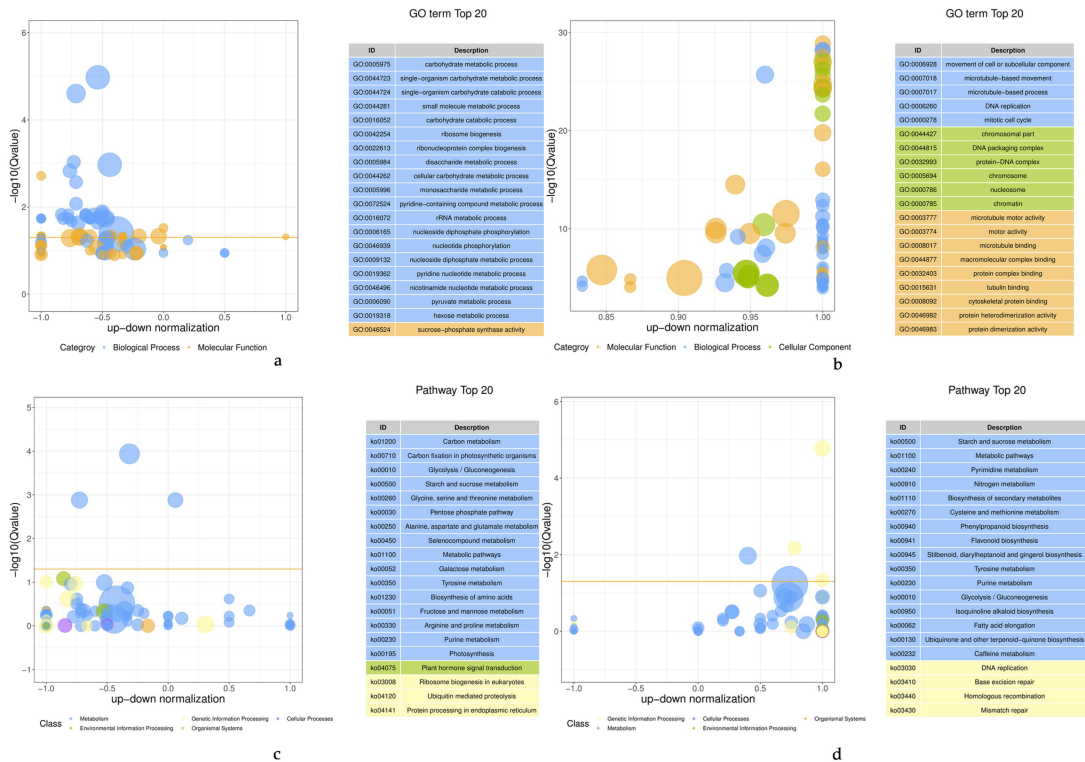

**Figure S3.** Z-score bubble plot of enrichment analysis. Up-down normalization represents the proportion of the difference between the number of up-regulated genes and the number of down-regulated genes in the total differential genes; The bubble size represents gene count, different colors represent different GO or KEGG categories, and the orange line represents the threshold value of Q-value=0.05; On the right side of every figure is the GO term / Pathway list

[illegible]

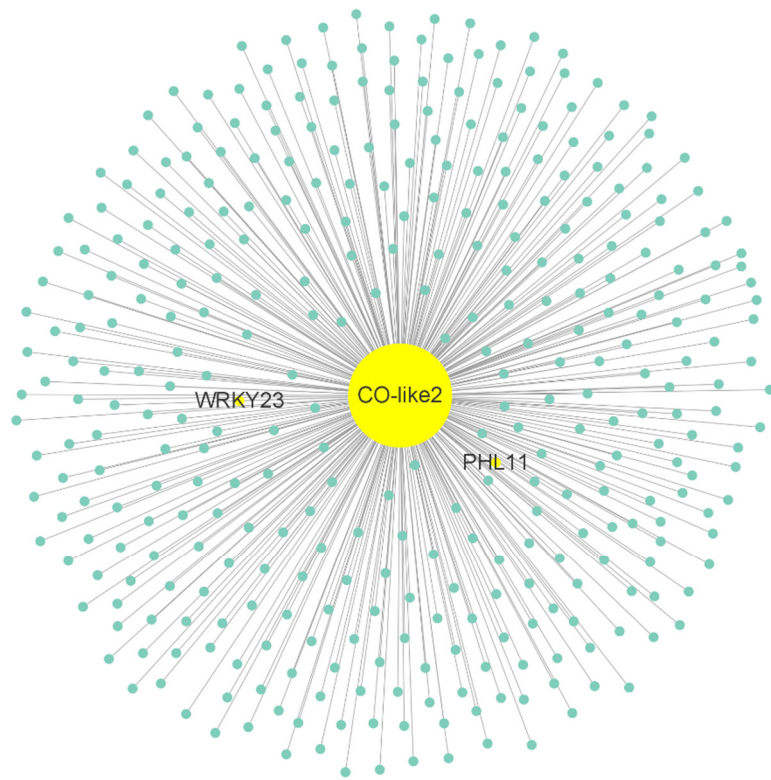

**Figure S5.** Regulatory network of *CO-like 2* gene in blue module
