# Supplementary material for: Differentially Expressed Genes Related to Flowering Transition between Once- and Continuous-Flowering Roses
Source: Biomolecules. 2021 Dec 31;12(1):58. doi: 10.3390/biom12010058 (PMC8773502; doi:10.3390/biom12010058)
Supplement: Supplementary file 1 [file biomolecules-12-00058-s001.zip › Supplementary table.xlsx]

## Sheet: Table S1
Table S1 The natural environmental conditions of the open field in the nursery
(The data are from Beijing meteorological center)
Date	Average daily relative humidity (%)	Daylength (h)	Sunshine duration (h)	Daily maximum temperature (℃)	Daily minimum temperature (℃)	Daily mean temperature (℃)
2019.04.30	20	13.8	11.8	20	14.5	19.4
2019.05.01	17	13.9	12.3	30.1	5.8	18.2
2019.05.02	19	13.9	12.2	31.9	9.5	21.3
2019.05.03	27	14	3.2	28.9	14.9	21.6
2019.05.04	44	14	8.7	28.4	15.4	21.6
2019.05.05	25	14	10.5	24.6	6	16.6
2019.05.06	17	14.1	12.5	26	4.5	16.6
2019.05.07	15	14.1	11.7	29.9	9	20.6
2019.05.08	29	14.1	4.1	29	9.1	19.4
2019.06.10	46	14.9	13.1	34.4	18.2	25.7
2019.06.11	56	15	12.1	32.7	19.1	26.2
2019.06.12	52	15	8.1	33.5	21.6	26.9
2019.06.13	54	15	6	33.6	18.7	25.9
2019.06.14	36	15	13.9	36.3	19.3	28.7
2019.06.15	38	15	8	32.5	19.3	26.7
2019.06.16	76	15	0.1	20.1	18	18.9
2019.06.17	86	15	2.5	27.9	17.3	22.3
2019.06.18	67	15	11.1	33.9	21.2	26.8

## Sheet: Table S2
Table S2 Candidate gene information and specific primer information of qRT-PCR
module	Gene	Gene ID	Gene symbol	Blast swiss prot	Gene description	Primer sequence(5’-3’)
blue	INV1	RC0G0091200	LOC112187488	sp|Q43866|INV1_ARATH Beta-fructofuranosidase, insoluble isoenzyme CWINV1 OS=Arabidopsis thaliana GN=CWINV1 PE=1 SV=1//0	beta-fructofuranosidase, insoluble isoenzyme CWINV1 [Rosa chinensis]	—
blue	SPSA1	RC2G0030000	LOC112185776	sp|O22060|SPSA1_CITUN Probable sucrose-phosphate synthase 1 OS=Citrus unshiu GN=SPS1 PE=2 SV=1//0	probable sucrose-phosphate synthase 1 [Rosa chinensis]	—
blue	AMY3	RC2G0602200	LOC112187044	sp|Q94A41|AMY3_ARATH Alpha-amylase 3, chloroplastic OS=Arabidopsis thaliana GN=AMY3 PE=2 SV=1//6.04238e-165	—	—
brown	FRI 5	RC3G0372000	LOC112193666	sp|Q9FFF1|FRL1A_ARATH FRIGIDA-like protein 1 OS=Arabidopsis thaliana GN=FRL1 PE=1 SV=1//4.59003e-09	FRIGIDA-like protein 5 [Rosa chinensis]	—
brown	ERF92	RC3G0395900	LOC112193893	sp|Q8LDC8|ERF92_ARATH Ethylene-responsive transcription factor 1B OS=Arabidopsis thaliana GN=ERF1B PE=1 SV=2//8.53309e-44	ethylene-response factor C3 [Rosa chinensis]	—
brown	BAM1	RC4G0074700	LOC112196729	sp|Q9LIR6|BAM1_ARATH Beta-amylase 1, chloroplastic OS=Arabidopsis thaliana GN=BAM1 PE=1 SV=1//0	beta-amylase 1, chloroplastic [Rosa chinensis]	—
blue	BAM9	RC4G0267800	LOC112200763	sp|Q8VYW2|BAM9_ARATH Inactive beta-amylase 9 OS=Arabidopsis thaliana GN=BAM9 PE=2 SV=1//0	inactive beta-amylase 9 [Rosa chinensis]	—
brown	PAN	RC4G0397600	LOC112197127	sp|Q9SX27|PAN_ARATH Transcription factor PERIANTHIA OS=Arabidopsis thaliana GN=PAN PE=1 SV=1//3.45672e-131	transcription factor TGA2.2 [Rosa chinensis]	—
brown	E133	RC4G0463900	LOC112200415	sp|Q9ZU91|E133_ARATH Glucan endo-1,3-beta-glucosidase 3 OS=Arabidopsis thaliana GN=At2g01630 PE=1 SV=2//0	glucan endo-1,3-beta-glucosidase 3 [Rosa chinensis]	—
brown	PGMC	RC4G0465300	LOC112197974	sp|Q9ZSQ4|PGMC_POPTN Phosphoglucomutase, cytoplasmic OS=Populus tremula GN=PGM1 PE=2 SV=1//0	phosphoglucomutase, cytoplasmic [Rosa chinensis]	—
blue	PHS1	RC5G0084400	LOC112202190	sp|Q00766|PHS1_DICDI Glycogen phosphorylase 1 OS=Dictyostelium discoideum GN=glpV PE=1 SV=3//0	glycogen phosphorylase 1 [Rosa chinensis]	—
blue	PHYE	RC5G0119600	LOC112168142	sp|P55004|PHYE_IPONI Phytochrome E OS=Ipomoea nil GN=PHYE PE=2 SV=1//0	phytochrome E [Rosa chinensis]	—
brown	CO	RC5G0229500	LOC112201667	-//-	zinc finger protein CONSTANS [Rosa chinensis]	—
brown	E134	RC5G0732400	LOC112165487	sp|Q94CD8|E134_ARATH Glucan endo-1,3-beta-glucosidase 4 OS=Arabidopsis thaliana GN=At3g13560 PE=1 SV=1//0	glucan endo-1,3-beta-glucosidase 4 [Rosa chinensis]	—
blue	SPSA4	RC6G0004400	LOC112169498	sp|F4JLK2|SPSA4_ARATH Probable sucrose-phosphate synthase 4 OS=Arabidopsis thaliana GN=SPS4 PE=1 SV=1//0	probable sucrose-phosphate synthase 4 [Rosa chinensis]	—
blue	AFP4	RC6G0340200	LOC112168817	sp|Q94F39|AFP3_ARATH Ninja-family protein AFP3 OS=Arabidopsis thaliana GN=AFP3 PE=1 SV=1//3.2313e-24	ninja-family protein AFP4 [Rosa chinensis]	—
brown	ISOA2	RC6G0411600	LOC112174517	sp|Q8L735|ISOA2_ARATH Isoamylase 2, chloroplastic OS=Arabidopsis thaliana GN=ISA2 PE=1 SV=2//0	isoamylase 2, chloroplastic [Rosa chinensis]	—
blue	GLGL1	RC6G0470300	LOC112171355	sp|P55233|GLGL1_BETVU Glucose-1-phosphate adenylyltransferase large subunit, chloroplastic/amyloplastic OS=Beta vulgaris GN=AGPS1 PE=2 SV=1//0	glucose-1-phosphate adenylyltransferase large subunit, chloroplastic/amyloplastic [Rosa chinensis]	—
blue	AMY2	RC6G0526100	LOC112172733	sp|Q8LFG1|AMY2_ARATH Probable alpha-amylase 2 OS=Arabidopsis thaliana GN=AMY2 PE=2 SV=1//0	probable alpha-amylase 2 [Rosa chinensis]	—
blue	AI5L5	RC6G0562900	LOC112169129	sp|Q9M7Q4|AI5L5_ARATH ABSCISIC ACID-INSENSITIVE 5-like protein 5 OS=Arabidopsis thaliana GN=ABF2 PE=1 SV=1//3.41704e-94	bZIP transcription factor 46 [Rosa chinensis]	—
brown	BGL44	RC7G0019500	LOC112176681	sp|Q9LV33|BGL44_ARATH Beta-glucosidase 44 OS=Arabidopsis thaliana GN=BGLU44 PE=2 SV=1//0	beta-glucosidase 44 [Rosa chinensis]	—
brown	CMB1	RC7G0064100	LOC112179360	sp|Q39685|CMB1_DIACA MADS-box protein CMB1 OS=Dianthus caryophyllus GN=CMB1 PE=2 SV=1//5.83535e-92	agamous-like MADS-box protein MADS2 [Rosa chinensis]	—
blue	TPPF	RC7G0234400	LOC112179256	sp|Q9SU39|TPPF_ARATH Probable trehalose-phosphate phosphatase F OS=Arabidopsis thaliana GN=TPPF PE=2 SV=1//4.75389e-176	probable trehalose-phosphate phosphatase F [Rosa chinensis]	—
brown	VIL2	RC7G0521300	LOC112179806	sp|Q9SUM4|VIL2_ARATH VIN3-like protein 2 OS=Arabidopsis thaliana GN=VIL2 PE=1 SV=1//7.34432e-116	VIN3-like protein 2 [Rosa chinensis]	—
brown	FRI 1	RC7G0533800	LOC112180442	sp|Q67ZB3|FRL3_ARATH FRIGIDA-like protein 3 OS=Arabidopsis thaliana GN=FRL3 PE=1 SV=1//1.49458e-08	FRIGIDA-like protein 1 [Rosa chinensis]	—
blue	ISOA3	RC7G0542200	LOC112178778	sp|Q9M0S5|ISOA3_ARATH Isoamylase 3, chloroplastic OS=Arabidopsis thaliana GN=ISA3 PE=2 SV=2//0	isoamylase 3, chloroplastic [Rosa chinensis]	—
brown	TPPD	RC7G0559900	LOC112179311	sp|Q67XC9|TPPD_ARATH Probable trehalose-phosphate phosphatase D OS=Arabidopsis thaliana GN=TPPD PE=2 SV=1//1.31254e-166	probable trehalose-phosphate phosphatase D [Rosa chinensis]	—
brown	VIL 1	RC2G0059100	LOC112189211	sp|Q9LHF5|VIL1_ARATH VIN3-like protein 1 OS=Arabidopsis thaliana GN=VIL1 PE=1 SV=1//2.64969e-170	VIN3-like protein 1 [Rosa chinensis]	F: CGCTGGTGATGTGCTAAA
						R:AAGTGAACCCTCTCTGTTTG
blue	FRI 3	RC7G0268000	LOC112175648	sp|A0SWL0|FRL2A_ARATH FRIGIDA-like protein 2 OS=Arabidopsis thaliana GN=FRL2 PE=3 SV=1//2.21788e-08	FRIGIDA-like protein 3 [Rosa chinensis]	F: CACTAAGGATGCAGGGAATG
						R:GAACAGAAGCAGCCAGTATAG
blue	AP2 like	RC2G0197000	LOC112187948	sp|P47927|AP2_ARATH Floral homeotic protein APETALA 2 OS=Arabidopsis thaliana GN=AP2 PE=1 SV=1//9.30912e-118	floral homeotic protein APETALA 2-like [Rosa chinensis]	F: GAGCAAGATATTCGGGTTCTC
						R:GGTTCCATTTCGGAGGATTC
blue	CO like 2	RC2G0585400	LOC112189044	sp|Q96502|COL2_ARATH Zinc finger protein CONSTANS-LIKE 2 OS=Arabidopsis thaliana GN=COL2 PE=1 SV=1//1.40115e-110	zinc finger protein CONSTANS-LIKE 2 [Rosa chinensis]	F: GGACGAAGAAGATGAAGATGAG
						R:AACCTCCACTCCGAAGAA
brown	FD	RC2G0130500	LOC112190274	sp|Q84JK2|FD_ARATH Protein FD OS=Arabidopsis thaliana GN=FD PE=1 SV=1//9.9095e-17	protein FD [Rosa chinensis]	F: CAGTGGTGCTTACCCATTT
						R:GATTCCGGTAACCTCTTCTTC
blue	SOC1	RC1G0310700	LOC112179159	sp|O64645|SOC1_ARATH MADS-box protein SOC1 OS=Arabidopsis thaliana GN=SOC1 PE=1 SV=1//8.35772e-70	MADS-box protein SOC1 [Rosa chinensis]	F: CAACCAGTAAGTGAGCAGAG
						R:CTTTCTGGCAGTCCAATGA
—	TCTP	—	—	—	the internal reference gene	F: CGATTCTACTTCACATAA
						R: GTATCTATCCGTAACTATC

## Sheet: Table S3
Table S3 Tests of between-subjects effects between YYF2 and HD
	factor	df	F	Sig.
VIL 1	development stage	3	331.502	0
	cultivar	1	890.074	0
	development stage*cultivar	3	334.597	0
FRI 3	development stage	3	26.869	0
	cultivar	1	232.561	0
	development stage*cultivar	3	19.127	0
AP2 like	development stage	3	58.619	0
	cultivar	1	404.098	0
	development stage*cultivar	3	64.803	0
CO like 2	development stage	3	79.852	0
	cultivar	1	505.003	0
	development stage*cultivar	3	86.357	0
FD	development stage	3	96.907	0
	cultivar	1	1266.01	0
	development stage*cultivar	3	103.025	0
SOC1	development stage	3	17.991	0
	cultivar	1	690.002	0
	development stage*cultivar	3	17.984	0

## Sheet: Table S4
Table S4 Tests of between-subjects effects in YYF1, YYF2 and YYF3
	factor	df	F	Sig.
VIL 1	development stage	3	59.555	0
	environment	2	300.871	0
	development stage*environment	6	57.907	0
FRI 3	development stage	3	23.824	0
	environment	2	327.449	0
	development stage*environment	6	21.319	0
AP2 like	development stage	3	107.889	0
	environment	2	1177.76	0
	development stage*environment	6	158.245	0
CO like 2	development stage	3	18.588	0
	environment	2	223.797	0
	development stage*environment	6	9.749	0
FD	development stage	3	16.633	0
	environment	2	1070.05	0
	development stage*environment	6	26.335	0
SOC1	development stage	3	77.417	0
	environment	2	1930.34	0
	development stage*environment	6	47.386	0

## Sheet: Table S5
Table S5 Cis-acting elements and prediction functions of promoter fragments of CO-like 2 in Rosa chinensis 'Old Blush'
Cis-acting element	Core sequence(5’-3’)	Position	Strand	source	function
TGA-element	AACGAC	752	-	Brassica oleracea	auxin-responsive element
TGA-element	AACGAC	1618	-	Brassica oleracea	auxin-responsive element
ACE	GACACGTATG	883	+	Petroselinum crispum	cis-acting element involved in light responsiveness
LTR	CCGAAA	1592	+	Hordeum vulgare	cis-acting element involved in low-temperature responsiveness
LTR	CCGAAA	1754	-	Hordeum vulgare	cis-acting element involved in low-temperature responsiveness
TCA-element	TCAGAAGAGG	1692	-	Brassica oleracea	cis-acting element involved in salicylic acid responsiveness
ABRE	TACGTGTC	883	-	Oryza sativa	cis-acting element involved in the abscisic acid responsiveness
ABRE	ACGTG	885	-	Arabidopsis thaliana	cis-acting element involved in the abscisic acid responsiveness
ABRE	ACGTG	897	+	Arabidopsis thaliana	cis-acting element involved in the abscisic acid responsiveness
ABRE	ACGTG	977	+	Arabidopsis thaliana	cis-acting element involved in the abscisic acid responsiveness
ABRE	CACGTG	1129	-	Arabidopsis thaliana	cis-acting element involved in the abscisic acid responsiveness
ABRE	ACGTG	1130	+	Arabidopsis thaliana	cis-acting element involved in the abscisic acid responsiveness
ABRE	GCAACGTGTC	1273	+	Hordeum vulgare	cis-acting element involved in the abscisic acid responsiveness
ABRE	CACGTG	1275	-	Arabidopsis thaliana	cis-acting element involved in the abscisic acid responsiveness
ABRE	ACGTG	1276	+	Arabidopsis thaliana	cis-acting element involved in the abscisic acid responsiveness
ABRE	ACGTG	1690	-	Arabidopsis thaliana	cis-acting element involved in the abscisic acid responsiveness
ABRE	CACGTG	1708	-	Arabidopsis thaliana	cis-acting element involved in the abscisic acid responsiveness
ABRE	ACGTG	1709	+	Arabidopsis thaliana	cis-acting element involved in the abscisic acid responsiveness
ABRE	GACACGTGGC	1908	-	Triticum aestivum	cis-acting element involved in the abscisic acid responsiveness
ABRE	CACGTG	1910	-	Arabidopsis thaliana	cis-acting element involved in the abscisic acid responsiveness
ABRE	ACGTG	1911	+	Arabidopsis thaliana	cis-acting element involved in the abscisic acid responsiveness
G-box	TACGTG	885	-	Arabidopsis thaliana	cis-acting regulatory element involved in light responsiveness
G-box	CACGTC	896	-	Zea mays	cis-acting regulatory element involved in light responsiveness
G-box	CACGTC	976	-	Zea mays	cis-acting regulatory element involved in light responsiveness
G-box	GCCACGTGGA	1127	-	Arabidopsis thaliana	cis-acting regulatory element involved in light responsiveness
G-box	CACGTG	1129	-	Arabidopsis thaliana	cis-acting regulatory element involved in light responsiveness
G-Box	CACGTG	1129	-	Pisum sativum	cis-acting regulatory element involved in light responsiveness
G-box	ACACGTGGC	1273	-	Brassica napus	cis-acting regulatory element involved in light responsiveness
G-box	CACGTG	1275	-	Arabidopsis thaliana	cis-acting regulatory element involved in light responsiveness
G-Box	CACGTG	1275	-	Pisum sativum	cis-acting regulatory element involved in light responsiveness
G-box	CACGTC	1690	+	Zea mays	cis-acting regulatory element involved in light responsiveness
G-box	CACGTG	1708	-	Arabidopsis thaliana	cis-acting regulatory element involved in light responsiveness
G-Box	CACGTG	1708	-	Pisum sativum	cis-acting regulatory element involved in light responsiveness
G-box	GCCACGTGGA	1908	-	Arabidopsis thaliana	cis-acting regulatory element involved in light responsiveness
G-box	CACGTG	1910	-	Arabidopsis thaliana	cis-acting regulatory element involved in light responsiveness
G-Box	CACGTG	1910	-	Pisum sativum	cis-acting regulatory element involved in light responsiveness
CGTCA-motif	CGTCA	657	-	Hordeum vulgare	cis-acting regulatory element involved in the MeJA-responsiveness
CGTCA-motif	CGTCA	895	-	Hordeum vulgare	cis-acting regulatory element involved in the MeJA-responsiveness
CGTCA-motif	CGTCA	975	-	Hordeum vulgare	cis-acting regulatory element involved in the MeJA-responsiveness
CGTCA-motif	CGTCA	1137	-	Hordeum vulgare	cis-acting regulatory element involved in the MeJA-responsiveness
CGTCA-motif	CGTCA	1140	+	Hordeum vulgare	cis-acting regulatory element involved in the MeJA-responsiveness
TGACG-motif	TGACG	657	+	Hordeum vulgare	cis-acting regulatory element involved in the MeJA-responsiveness
TGACG-motif	TGACG	895	+	Hordeum vulgare	cis-acting regulatory element involved in the MeJA-responsiveness
TGACG-motif	TGACG	975	+	Hordeum vulgare	cis-acting regulatory element involved in the MeJA-responsiveness
TGACG-motif	TGACG	1137	+	Hordeum vulgare	cis-acting regulatory element involved in the MeJA-responsiveness
TGACG-motif	TGACG	1140	-	Hordeum vulgare	cis-acting regulatory element involved in the MeJA-responsiveness
O2-site	GATGA(C/T)(A/G)TG(A/G)	973	+	Zea mays	cis-acting regulatory element involved in zein metabolism regulation
CAT-box	GCCACT	1145	+	Arabidopsis thaliana	cis-acting regulatory element related to meristem expression
CAAT-box	CAAAT	504	-	Pisum sativum	common cis-acting element in promoter and enhancer regions
CAAT-box	CCAAT	515	+	Arabidopsis thaliana	common cis-acting element in promoter and enhancer regions
CAAT-box	CAAAT	555	+	Pisum sativum	common cis-acting element in promoter and enhancer regions
CAAT-box	CAAAT	744	-	Pisum sativum	common cis-acting element in promoter and enhancer regions
CAAT-box	CAAAT	1306	-	Pisum sativum	common cis-acting element in promoter and enhancer regions
GC-motif	CCCCCG	1820	+	Zea mays	enhancer-like element involved in anoxic specific inducibility
GC-motif	CCCCCG	1849	+	Zea mays	enhancer-like element involved in anoxic specific inducibility
GC-motif	CCCCCG	1965	+	Zea mays	enhancer-like element involved in anoxic specific inducibility
P-box	CCTTTTG	1063	-	Oryza sativa	gibberellin-responsive element
P-box	CCTTTTG	1762	-	Oryza sativa	gibberellin-responsive element
Sp1	GGGCGG	1121	-	Oryza sativa	light responsive element
CCAAT-box	CAACGG	1289	-	Hordeum vulgare	MYBHv1 binding site
Box 4	ATTAAT	290	+	Petroselinum crispum	part of a conserved DNA module involved in light responsiveness
Box 4	ATTAAT	569	+	Petroselinum crispum	part of a conserved DNA module involved in light responsiveness
Box II	CCACGTGGC	1128	+	Petroselinum crispum	part of a light responsive element
I-box	cCATATCCAAT	239	+	Flaveria trinervia	part of a light responsive element
TCT-motif	TCTTAC	1158	+	Arabidopsis thaliana	part of a light responsive element
AE-box	AGAAACTT	1559	+	Arabidopsis thaliana	part of a module for light response
Myb	TAACTG	789	-	Arabidopsis thaliana	Myb binding element
MYB	CAACCA	800	-	Arabidopsis thaliana	Myb binding element
MYB	TAACCA	1091	+	Arabidopsis thaliana	Myb binding element
MYB	CAACAG	1315	+	Arabidopsis thaliana	Myb binding element
Myb	TAACTG	1339	-	Arabidopsis thaliana	Myb binding element
MYB	CAACCA	1863	+	Arabidopsis thaliana	Myb binding element
Myb	TAACTG	1956	-	Arabidopsis thaliana	Myb binding element
MYB recognition site	CCGTTG	1289	+	Arabidopsis thaliana	Myb binding element
Myb-binding site	CAACAG	1315	+	Nicotiana tabacum	Myb binding element
MYB-like sequence	TAACCA	1091	+	Arabidopsis thaliana	Myb binding element
W box	TTGACC	949	+	Arabidopsis thaliana	WRKY recognition site
W box	TTGACC	1361	+	Arabidopsis thaliana	WRKY recognition site
W box	TTGACC	1367	-	Arabidopsis thaliana	WRKY recognition site
W box	TTGACC	1703	+	Arabidopsis thaliana	WRKY recognition site

## Sheet: Table S6
Table S6 The binding site of transcription factor in the promoter element of CO-like 2
Matrix ID	Name	Uniprot ID	Source	Score	Relative score	Start	End	Strand	Predicted sequence
MA1080.1	WRKY23	O22900	25215497	9.93144	0.915268	270	277	+	AGTCAAAC
MA1080.1	WRKY23	O22900	25215497	5.36635	0.829617	771	778	+	AGTAAAAG
MA1080.1	WRKY23	O22900	25215497	12.1934	0.957707	933	940	+	AGTCAACC
MA1080.1	WRKY23	O22900	25215497	4.17714	0.807304	981	988	-	GGGCAACA
MA1080.1	WRKY23	O22900	25215497	5.63604	0.834677	1097	1104	+	AGTCAAGC
MA1080.1	WRKY23	O22900	25215497	8.73446	0.89281	1360	1367	-	GGTCAAAA
MA1080.1	WRKY23	O22900	25215497	4.43906	0.812219	1368	1375	+	GGTCAAGA
MA1080.1	WRKY23	O22900	25215497	5.63604	0.834677	1434	1441	-	AGTCAATA
MA1080.1	WRKY23	O22900	25215497	5.37413	0.829763	1495	1502	-	AGTCGACA
MA1080.1	WRKY23	O22900	25215497	4.16937	0.807159	1521	1528	+	GATCAAAG
MA1080.1	WRKY23	O22900	25215497	5.63604	0.834677	1544	1551	+	AGTCAATA
MA1080.1	WRKY23	O22900	25215497	6.43129	0.849597	1743	1750	-	GGTCCACG
MA1080.1	WRKY23	O22900	25215497	4.16937	0.807159	1768	1775	+	GGCCAAAG
MA1080.1	WRKY23	O22900	25215497	5.37413	0.829763	1861	1868	+	AGCCAACC
MA1163.1	PHL11	C0SVS4	27203113	9.54427	0.855856	993	1006	+	GAAGGAATTTTCAT
MA1163.1	PHL11	C0SVS4	27203113	8.01675	0.831712	405	418	+	AATCTAATATTTTG
MA1163.1	PHL11	C0SVS4	27203113	7.55083	0.824348	1719	1732	+	AGCCGAATCTTAGC
MA1163.1	PHL11	C0SVS4	27203113	7.52264	0.823902	92	105	-	TAGGGGATATTCAA
MA1163.1	PHL11	C0SVS4	27203113	7.44881	0.822735	40	53	+	TGAATAATATTTTG
MA1163.1	PHL11	C0SVS4	27203113	6.45859	0.807084	658	671	+	TGACGAATCTAAGA
MA1163.1	PHL11	C0SVS4	27203113	6.24933	0.803777	308	321	-	CATGGCATTTTCTT
MA1163.1	PHL11	C0SVS4	27203113	6.17243	0.802561	995	1008	-	AAATGAAAATTCCT
MA1163.1	PHL11	C0SVS4	27203113	6.17194	0.802553	1015	1028	+	GATGGATTCTTCAC
MA1163.2	PHL11	C0SVS4	ReMap	8.9307	0.828363	994	1007	+	AAGGAATTTTCATT
MA1163.2	PHL11	C0SVS4	ReMap	8.89936	0.827869	994	1007	-	AATGAAAATTCCTT
MA1163.2	PHL11	C0SVS4	ReMap	8.28414	0.818168	91	104	-	AGGGGATATTCAAT
MA1163.2	PHL11	C0SVS4	ReMap	8.23772	0.817436	91	104	+	ATTGAATATCCCCT
MA1163.2	PHL11	C0SVS4	ReMap	7.24819	0.801833	384	397	-	CAATAATATTATAC
MA1163.2	PHL11	C0SVS4	ReMap	7.23391	0.801608	384	397	+	GTATAATATTATTG
MA1163.2	PHL11	C0SVS4	ReMap	7.22911	0.801532	41	54	-	TCAAAATATTATTC
MA1163.2	PHL11	C0SVS4	ReMap	7.20561	0.801161	41	54	+	GAATAATATTTTGA
